# Supplementary material for: Network Pharmacology-Based Investigation of the Therapeutic Mechanisms of Action of Danning Tablets in Nonalcoholic Fatty Liver Disease
Source: Evid Based Complement Alternat Med. 2021 Apr 27;2021:3495360. doi: 10.1155/2021/3495360 (PMC8096548; doi:10.1155/2021/3495360)
Supplement: Supplementary Materials — Supplementary Table 1: information of all the bioactive compounds of DNt. Supplementary Table 2: the potential targets of DNt in the treatment of NAFLD [file 3495360.f1.zip]

Archive with 2 entries (2 files):
- 3495360.f1/Supplementary Table 1.docx
- 3495360.f1/Supplementary Table 2.docx
